# Supplementary material
Source: PubMed Central journal article supplement (PMC5393386)
Supplement: 10.1074_M116.064741_mcp.M116.064741-4.pdf [file 10.1074_M116.064741_mcp.M116.064741-4.pdf]

## Supplementary Contents

| <b>Title</b> | <b>Description</b>                                                                                                                    | <b>Page</b>   |
|--------------|---------------------------------------------------------------------------------------------------------------------------------------|---------------|
| Figure S1    | The pyrin domain of IFIX is the target for degradation                                                                                | 2             |
| Figure S2    | Cellular E3 ubiquitin ligase HUWE1 does not target IFIX for degradation during infection                                              | 3             |
| Figure S3    | IFIX-GFP and PELP1 localizations in uninfected and HSV-1 infected cells                                                               | 4             |
| Figure S4    | IFIX localization during infection with and without proteasome inhibition                                                             | 5             |
| Figure S5    | Removal of tetracycline, inducer of the IFIX-GFP 293 cell lines, reveals a long turnover rate for IFIX-GFP                            | 6             |
| Table S1     | IFIX interactions in uninfected and HSV-1 infected cells, as identified by immunoaffinity purification and mass spectrometry analyses | Separate file |
| Table S2     | List of primers for qPCR and IFIX subcloning                                                                                          | Separate file |

## Supplemental Figure S1

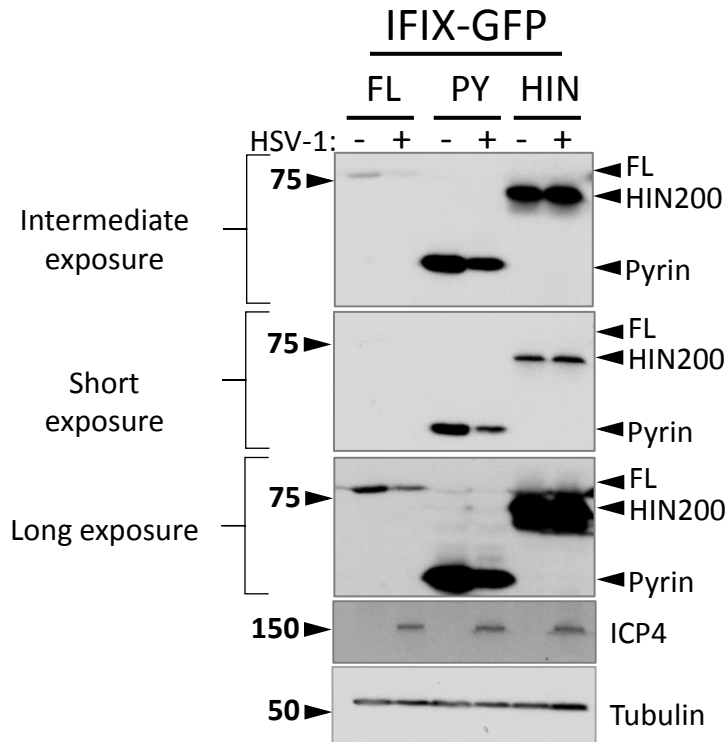

**Figure S1.** Western blot of 293Ts transfected with IFIX-GFP domain constructs reveals the pyrin domain of IFIX is the target for degradation. FL=full length, PY=pyrin domain, and HIN=HIN200 domain were visualized with an anti-GFP antibody. ICP4 is marker for infection and visualized with an anti-ICP4 antibody. Tubulin is loading control. MOI:10, 6hpi; each anti-GFP blot represents an intact western blotting membrane from each exposure.

## Supplemental Figure S2

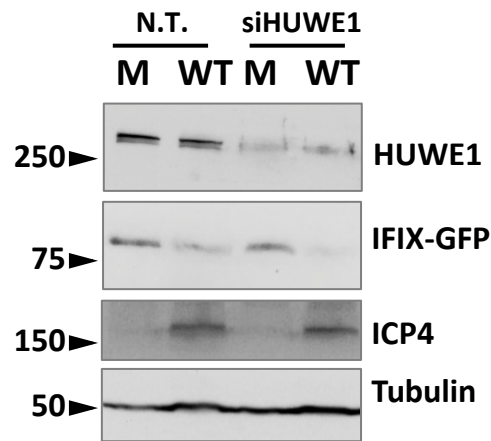

**Figure S2.** Cellular E3 ubiquitin ligase HUWE1 does not target IFIX for degradation during infection. Inducible IFIX-GFP 293 cells were transfected with the indicated siRNAs and infected with WT HSV-1 24 hours post transfection. MOI:10, 6hpi.

## Supplemental Figure S3

**A**

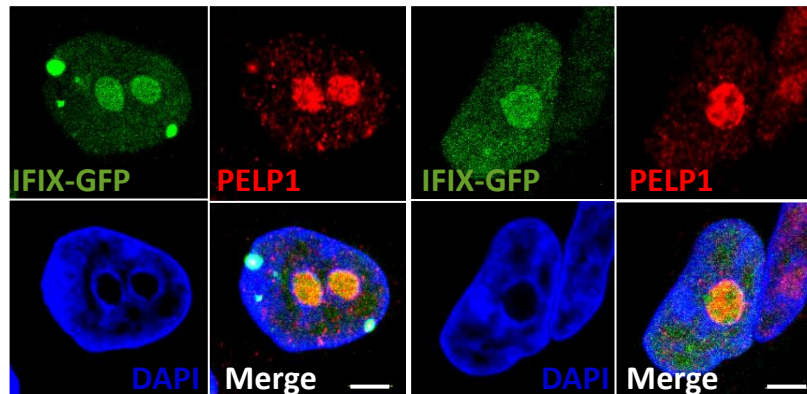

**B**

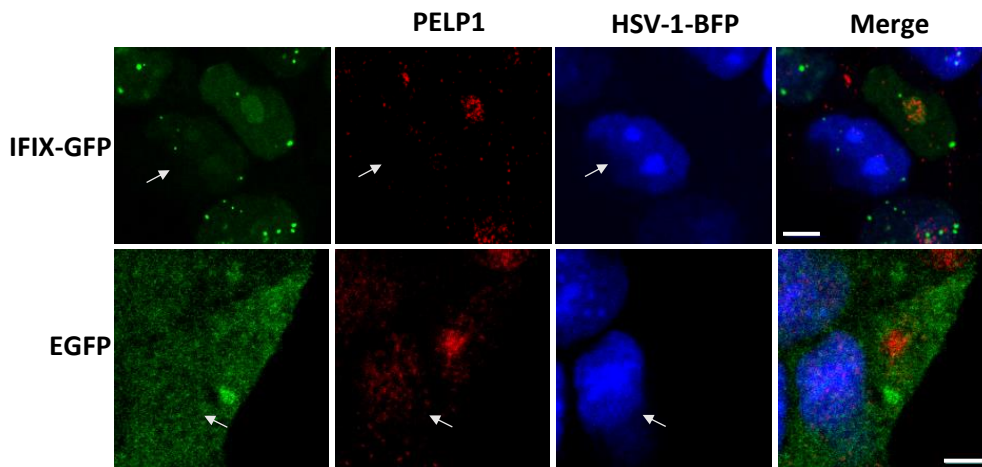

**Figure S3. IFIX-GFP and PELP1 localizations in uninfected and HSV-1 infected cells. A)** Colocalization of IFIX-GFP and PELP1 within nucleoli of uninfected cells. Microscopy images were taken at 60x oil objective. Bar=5 $\mu$ m. **B)** IF microscopy in IFIX-GFP and EGFP control 293 cells, showing a redistribution of 5FMC protein PELP1 in HSV-1-BFP infected cells (white arrows), MOI:5, 4hpi. Microscopy images were taken at 60x oil objective. Bar=5 $\mu$ m

## Supplemental Figure S4

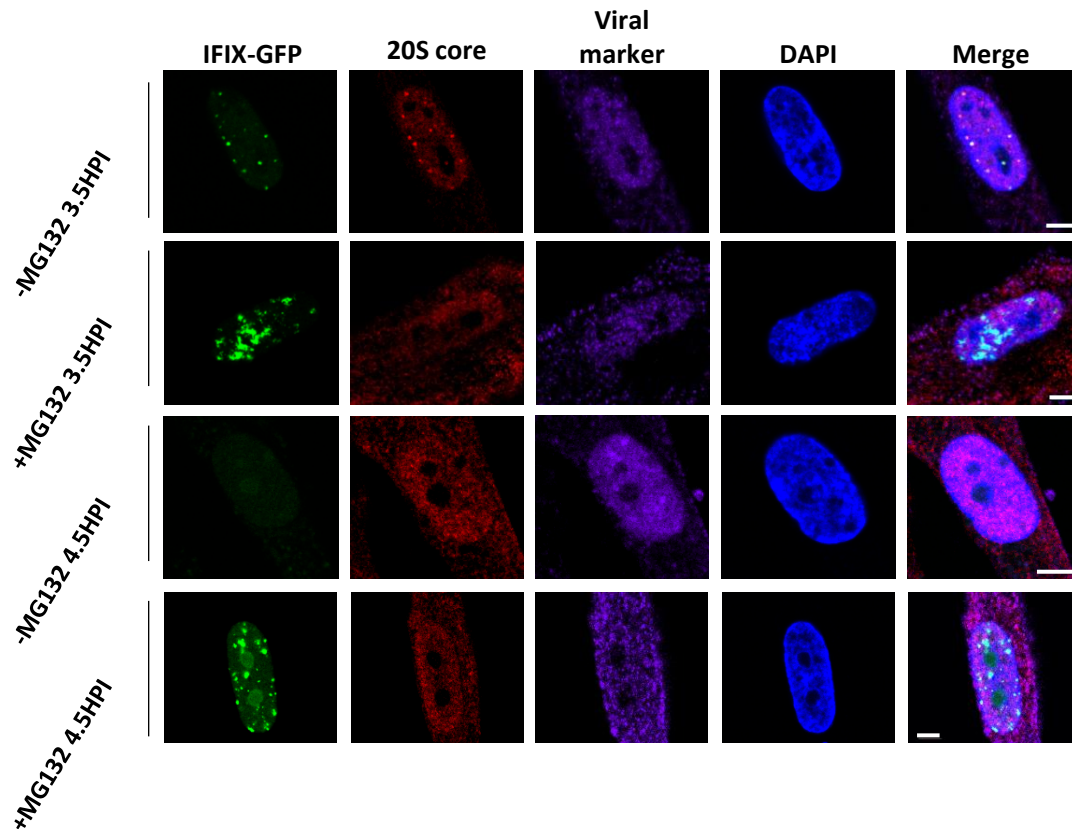

**Figure S4.** IFIX localization during HSV-1 infection with and without proteasome inhibition. IFIX-GFP stable fibroblasts were treated or not treated with MG132 and imaged at 3.5 and 4.5 hpi. IFIX-GFP, when prevented from degradation, formed aggregates. Microscopy images were taken at 60x oil objective. Bar=5 $\mu$ m

## Supplemental Figure S5

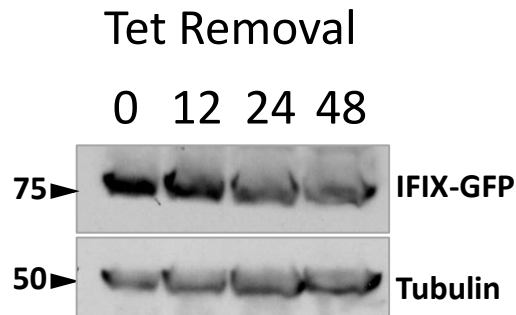

**Figure S5.** Removal of tetracycline inducer of the IFIX-GFP 293 cell lines for the indicated time points shows IFIX is still present after 48 hours, indicating the turnover rate of IFIX-GFP is longer than the intracellular HSV-1 lifecycle of 24 hours.
